# Supplementary material
Source: PubMed Central journal article supplement (PMC7388286)
Supplement: NIHMS1548917-supplement-Supplemental_Material.pdf [file NIHMS1548917-supplement-Supplemental_Material.pdf]

## SUPPLEMENTAL MATERIAL

**Title:** NFkB Activity Regulates Cell Type and Context Specific Susceptibility to Calcification in the Aortic Valve

**Author(s):** Terence Gee<sup>1</sup>, Emily Farrar<sup>1</sup>, Yidong Wang<sup>2</sup>, Bingruo Wu<sup>2</sup>, Kevin Hsu<sup>1</sup>, Bin Zhou<sup>2</sup>, Jonathan Butcher<sup>1,\*</sup>

**Author Affiliation(s):** <sup>1</sup>Meinig School of Biomedical Engineering, Cornell University, Ithaca, NY, USA. <sup>2</sup>Department of Genetics, Pediatrics, and Medicine (Cardiology), Wilf Cardiovascular Research Institute, Albert Einstein College of Medicine, Bronx, NY, USA.

\* **Correspondence:** Telephone: 607-255-3575, Email: jtb47@cornell.edu

### Major Resources Tables

#### Animals (in vivo studies)

| Mouse strain name                           | Vendor or Source                                          | Background Strain | Other Information                                                                                                                                            |
|---------------------------------------------|-----------------------------------------------------------|-------------------|--------------------------------------------------------------------------------------------------------------------------------------------------------------|
| C57BL/6J                                    | Jackson Laboratory:<br>000664                             | C57BL/6J          | Wildtype Back 6 strain used for backcrossing other mouse lines                                                                                               |
| B6.129S7-Ldlr <sup>tm1Her</sup> /J          | Jackson Laboratory:<br>002207                             | C57BL/6J          | Ldlr <sup>tm1Her</sup> targeted knockout for low density lipoprotein receptor                                                                                |
| B6;129S4-Gt(ROSA)26Sor <sup>tm1Sor</sup> /J | Jackson Laboratory:<br>003309                             | C57BL/6J          | Gtrosa26 <sup>tm1Sor</sup> targeted mutation of lacZ gene flanked by loxP sites                                                                              |
| Ikkkb <sup>tm2Mka</sup>                     | Michael Karin (University of California, San Diego)       | C57BL/6J          | LoxP sites insertion flanking exon 3, ATP binding site of catalytic domain                                                                                   |
| Nfatc1 <sup>tm1.1(cre)Bz</sup>              | Bin Zhou (Albert Einstein College of Medicine, Bronx, NY) | C57BL/6J          | Nfatc1 <sup>Cre</sup> , IRES-cre cDNA sequence inserted into 3' UTR of Nfatc1 gene.                                                                          |
| Tg(Nfatc1c-cre)1Bz                          | Bin Zhou (Albert Einstein College of Medicine, Bronx, NY) | C57BL/6J          | Nfatc1 <sup>enCre</sup> , nuclear localized cre recombinase sequence inserted between HSP68 minimal promoter and Nfatc1 intron 1 fragment (Nfatc1 enhancer). |

#### Antibodies

| Target antigen        | Vendor or Source          | Catalog # | Working concentration |
|-----------------------|---------------------------|-----------|-----------------------|
| mouse anti-human CD31 | Cell Signaling Technology | 3528      | 1:200                 |

|                               |                           |          |                  |
|-------------------------------|---------------------------|----------|------------------|
| rabbit anti-human NFkB p65    | Cell Signaling Technology | 8242     | 1:400            |
| mouse anti-human $\alpha$ SMA | Abcam                     | ab7817   | 10 ug/ml (1:100) |
| rabbit anti-human VCAM-1      | Cell Signaling Technology | 32653    | 1:100            |
| rabbit anti-human NFkB p65    | Cell Signaling Technology | 8242     | 1:400            |
| rabbit anti-human ki67        | Abcam                     | ab15580  | 10 ug/ml (1:100) |
| rabbit anti-mouse CD31        | Abcam                     | ab28364  | 1:50             |
| rabbit anti-human IKK $\beta$ | Abcam                     | ab124957 | 10 ug/ml (1:100) |
| rabbit anti-human VE-Cadherin | Cell Signaling Technology | 2500     | 1:200            |
| mouse anti-human Runx2        | Abcam                     | ab76956  | 10 ug/ml (1:100) |
| mouse-anti human Osteocalcin  | Abcam                     | ab13420  | 10 ug/ml (1:100) |

### qRT-PCR Primers

| Gene        | Forward Primer           | Reverse Primer           | Ascension Number   |
|-------------|--------------------------|--------------------------|--------------------|
| 18S         | TAGAGGGACAAGTGGCGT       | AATGGGGTTCAACGGGTT       | NR_046261.1        |
| ACTA2       | CAGCCAGGATGTGTGAAG<br>AA | TCACCCCCTGATGTCTAGG<br>A | NM_001164650<br>.1 |
| Osteocalcin | CTCCAGCCACAACATCCTT<br>T | TGGCCTCCAGCACTGTTTA<br>T | NM_001164004<br>.1 |
| PECAM1      | ATCTGCATCTCGTGGGAA<br>GT | GAGCTGAAGTGTCAGCAG<br>GA | NM_213907.1        |
| RUNX2       | GCACTACCCAGCCACCTT<br>TA | TATGGAGTGCTGCTGGTCT<br>G | XM_005666074.<br>3 |
| SNAI1       | GCCCAACTACAGCGAGCT<br>AC | CCAGGAGAGAGTCCCAGA<br>TG | XM_021077961.<br>1 |
| VE-Cadherin | CGTGGTGGAAACACAAGA<br>TG | TGTGTACCTGGTCTGGGT<br>GA | NM_001001649<br>.2 |

### Cultured Cells

| Name                                            | Vendor or Source                                 | Sex (F, M, or unknown) |
|-------------------------------------------------|--------------------------------------------------|------------------------|
| Porcine Aortic Valve Endothelial Cells (PAVEC)  | Primary cell isolation (Shirk Meats, Dundee, NY) | Male                   |
| Porcine Aortic Valve Interstitial Cells (PAVIC) | Primary cell isolation (Shirk Meats, Dundee, NY) | Male                   |

## Supplementary Figure SI.

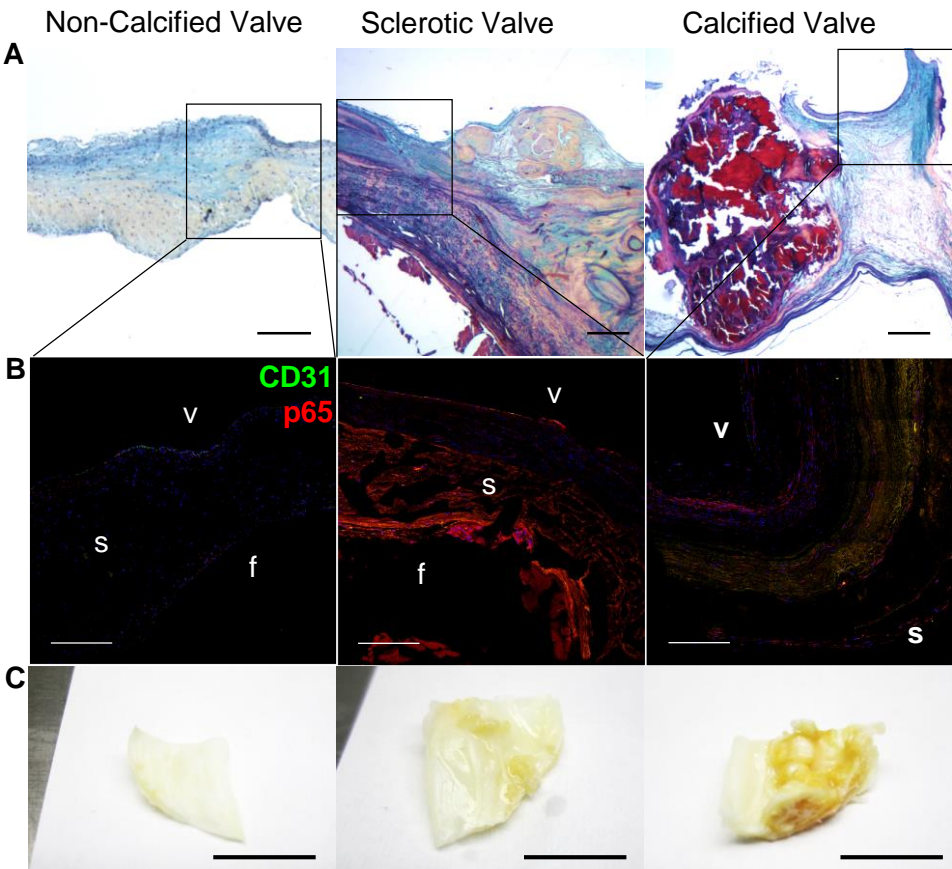

**Supplementary Figure SI.** A. Russell-Movat staining of non-calcified, sclerotic, and calcified/stenosed human aortic valves. Scale bar is 200 µm. B. Sister section immunofluorescence stain for NFκB p65 and CD31. Letters indicate trilaminar region classifications of valve for subsequent analysis (v: ventricularis, s: spongiosa, f: fibrosa). Scale bar is 200 µm. C. Macroscopic images of fixed non-calcified, sclerotic, and calcified/stenosed human aortic valves. Scale bar is 1 cm.

## Supplementary Figure SII.

**A**

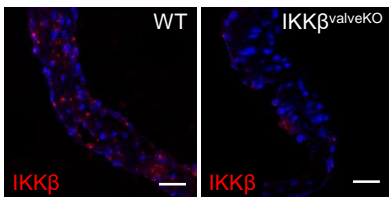

**B**

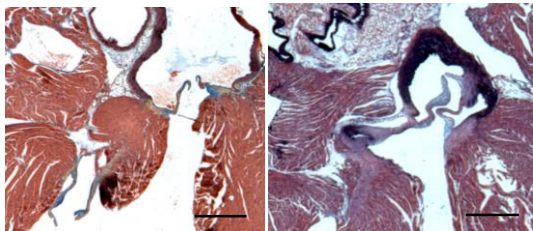

Russell-Movat

**C**

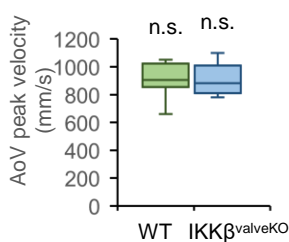

**D**

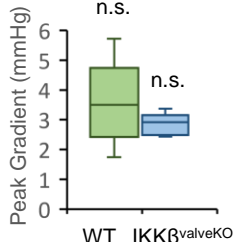

**E**

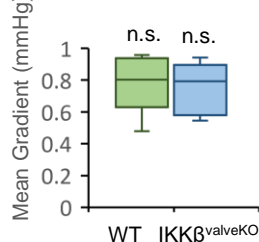

**F**

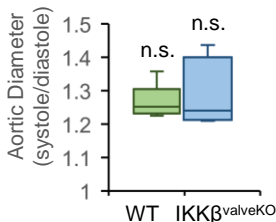

**G**

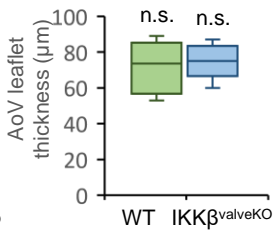

**Supplementary Figure SII.** A. Immunofluorescence staining of IKK $\beta$  expression of 5 month-old WT and IKK $\beta$ valveKO mouse valves, scale bar is 20  $\mu$ m. B. Russell-Movat staining of 5 month-old WT and IKK $\beta$ valveKO (Nfatc1<sup>Cre</sup>;IKK $\beta$ <sup>flox/flox</sup>) mouse hearts, magnified at aortic valve region. Scale bar is 0.5 mm. C-G. Echocardiographic measurements of peak velocity, peak gradient, and mean gradient through aortic valve, no difference between groups (n > 5). E. Measurement of aortic root diameter from echocardiographic M-mode with comparison between systolic and diastolic ratio, no difference between groups (n > 5). F. Thickness of the AoV leaflet, measured from EKV. No difference between groups. (n > 5). Error bars indicate SEM.

## Supplementary Figure SIII.

A

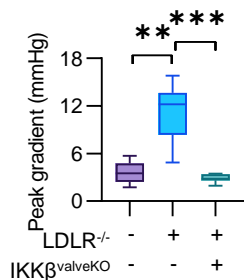

B

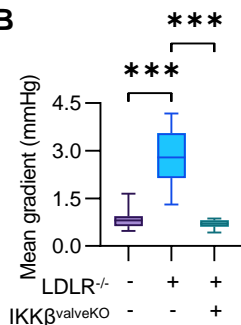

**Supplementary Figure SIII.** Echocardiographic measurement of Peak gradient (A) and Mean gradient (B) using the average peak from > three cardiac cycles for each mouse (WT: n=11 LDLR<sup>-/-</sup>: n=17, LDLR<sup>-/-</sup>-IKKβ<sup>valveKO</sup>: n=11). Asterisks indicate statistical significance between groups (\*: p < 0.05, \*\*: p < 0.005, \*\*\*: p < 0.0005).

## Supplementary Figure SIV.

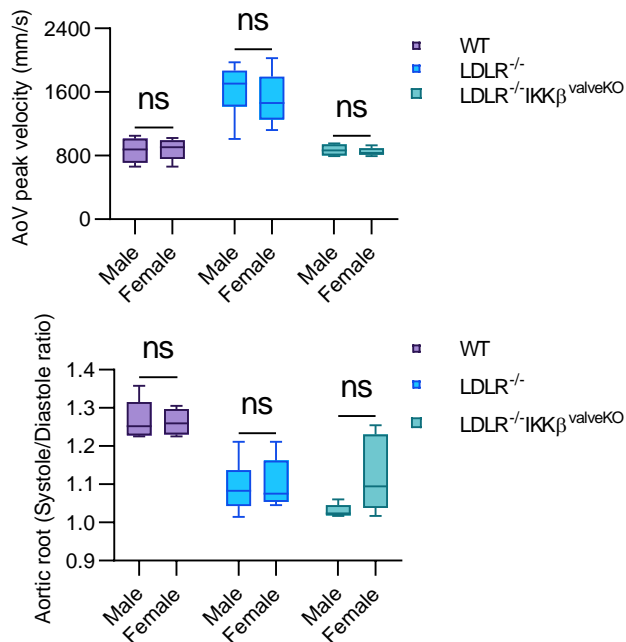

**Supplementary Figure SIV.** Comparison of Sex-specific echocardiographic parameters of transgenic mouse lines. (WT: n=6 male, 5 female LDLR<sup>-/-</sup>: n=10 male 7 female, LDLR<sup>-/-</sup>IKK $\beta$ <sup>valveKO</sup>: n=6 male 5 female)

## Supplementary Figure SV.

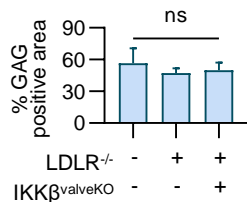

**Supplementary SV.** A. Glycosaminoglycan (GAG) content according to Russell-Movat stain (blue). n = 5. B. Valve area, calculated from the maximum valve area observed in each sample and averaged across all animals in each group (no significant differences). n = 5. Asterisks indicate statistically significant groups (\*: p < 0.05). Error bars indicate SEM.

## Supplementary Figure SVI.

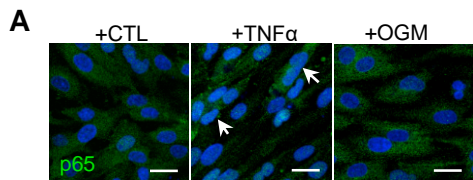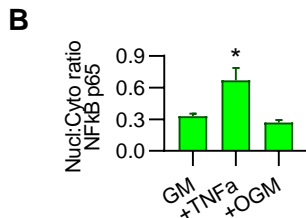

**Supplementary Figure SVI.** A. Representative images of p65 expression in 48 hour VEC on 3D hydrogels treated with TNF $\alpha$  or OGM. White arrows indicate cells with nuclear-positive signal. Scale bar is 20 $\mu$ m. B. Quantification of p65 nuclear translocation in VEC using the ratio of nuclear to cytosolic p65 protein (nuc:cyto ratio). n = 4. Asterisks indicate statistically significant groups (\*: p < 0.05).



## Supplementary Figure SVII.

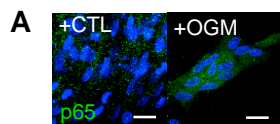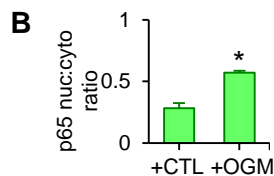

**Supplementary Figure SVII.** A. p65 expression in 14-day VIC in 3D hydrogels treated with CTL or OGM. Scale bar is 20 $\mu$ m. B. Quantification of p65 nuclear translocation in VIC using the ratio of nuclear to cytosolic p65 protein (nuc:cyto ratio). n = 4.

## Supplementary Figure SVIII.

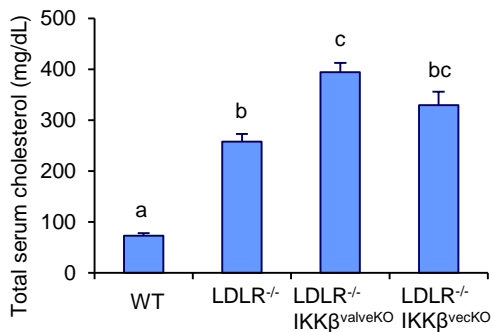

**Supplementary Figure SVIII.** Total serum cholesterol in each group, collected at 5 months of age (n = 5). Groups that do not share letters are statistically significant,  $p < 0.05$ . Error bars indicate SEM.

## Supplementary Figure SIX.

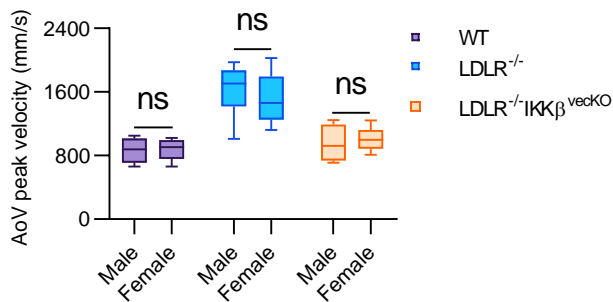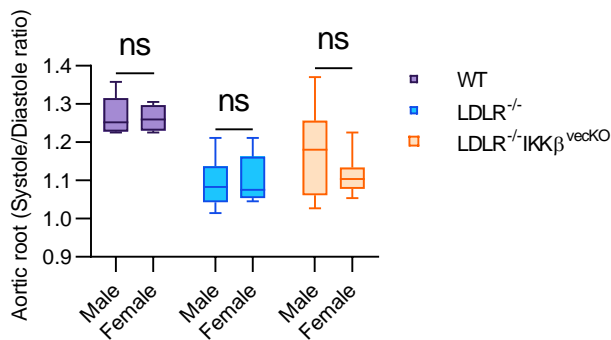

**Supplementary Figure SIX.** Comparison of Sex-specific echocardiographic parameters of transgenic mouse lines. (WT: n=6 male, 5 female LDLR<sup>-/-</sup>: n=10 male 7 female, LDLR<sup>-/-</sup>IKK $\beta$ <sup>vecko</sup>: n=6 male 9 female)
